# Supplementary material for: Role of Rabenosyn-5 and Rab5b in host cell cytosol uptake reveals conservation of endosomal transport in malaria parasites
Source: PubMed Central journal article supplement (PMC11168701; doi:10.1371/journal.pbio.3002639), 2024-05-31

### A FYVE domains

Logo of motifs

| Protein         | Residue | Sequence                                                        | Residue |
|-----------------|---------|-----------------------------------------------------------------|---------|
| Pf_Rbsn5L       | 44      | SELKTKEGDYCMTCKSNVKQLLYLHTKKNYCHLCEEIFCAYCVKSIDFMKDEKE          | 119     |
| PF3D7_1460100   | 32      | LWVPDEEVTNVCYSCNVVF-----NVRVRKHHCRACGNVFCSNCSDNKIKI SEYSYS----- | 96      |
| human_Protrudin | 122     | KRYPTNNFNGNCTGCSATF----SVLKKRRS CSNCGNSFCSRCCSFKVPKSSMGAT--     | 192     |
| yeast_PEP7      | 206     | PWRDDRSVLFNCISEPF-----GLLLRRKHHCR LCGMVVDDANRNCSEISIGYL-20aa-   | 297     |
| human_EEA1      | 1298    | KWAEDNEVQNCMACGKGF----SVTVRRHHCRQCGNIFCAECSAKNALT PSSKK-----    | 1411    |
| human_Rbsn5     | 147     | PWVNDQDVPFCPCGKNEF----SIRNRRHHCR LCGSIMCKKCMELISLPLANKLT-43aa-  | 260     |
| human_FYV1      | 148     | YWMPDSQCCKEYDCSEKF----TTFRRRHHCR LCGQIFCSRCCNQEIPGKFMGYT-----   | 218     |

Positively charged

Negatively charged

Polar Uncharged

Hydrophobic

Cysteine

\* residues critical for PI3P binding that do not follow consensus in Pf\_Rbsn5L

### B Rab-binding domains (RabBD)

| Protein           | Residue | Sequence                                                       | Residue |
|-------------------|---------|----------------------------------------------------------------|---------|
| PF_Rbsn5          | 130     | ----SVDRKAI DLQNSFNDI SNCYTNLCSNVPQLNGLVLLCENNKEFLDSFKSEIKQLEE | 195     |
| yeast_PEP7        | 464     | -----VLKE---QSYLI-ESTIQDYKKQRLEIVTLNKNLEELHSRIH-----           | 503     |
| Drosophila_Rbsn5  | 441     | ASKSSLDDPLIE---QINI I-KGYIKQARQDMNFEVVETLELNLELQREYERQRS--     | 494     |
| human_Rbsn5-copy1 | 458     | -----PLLQ---QIHNI-TSFIRQAKAAGRMDEVRTLQENLRQLQDEYDQQ-----       | 499     |
| human_Rbsn5-copy2 | 739     | -----LLQ---QIDNI-KAYIFDAKQCGRLDEVEVLTENLRLELKHITLAKQ-----      | 779     |

Positively charged

Negatively charged

Polar Uncharged

Hydrophobic

Cysteine

+ involved in conserved hydrogen bonds in human Rbsn5

### C

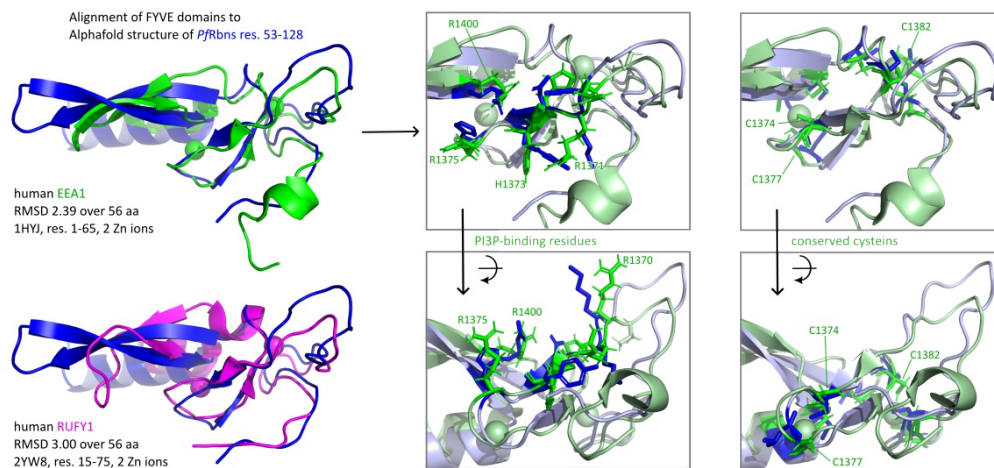

### D

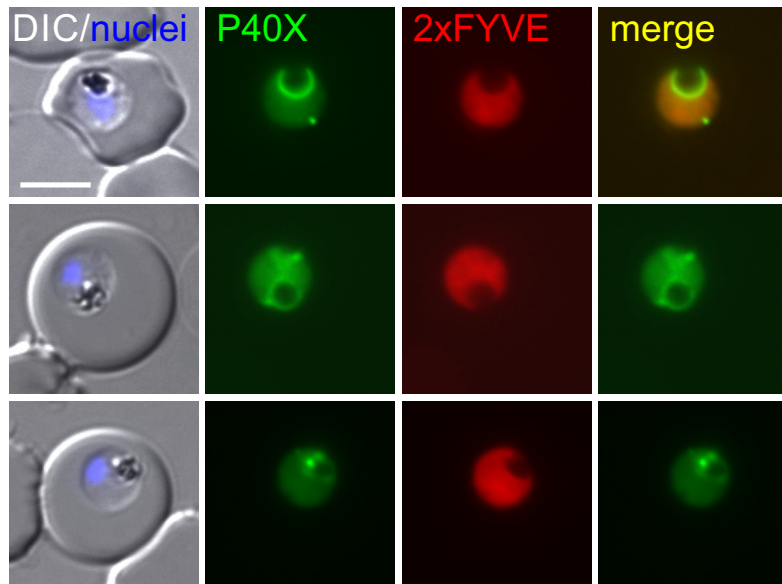

Supplement: pbio.3002639.s001.pdf [file pbio.3002639.s001.pdf]
