# Supplementary material for: Role of Rabenosyn-5 and Rab5b in host cell cytosol uptake reveals conservation of endosomal transport in malaria parasites
Source: PubMed Central journal article supplement (PMC11168701; doi:10.1371/journal.pbio.3002639), 2024-05-31

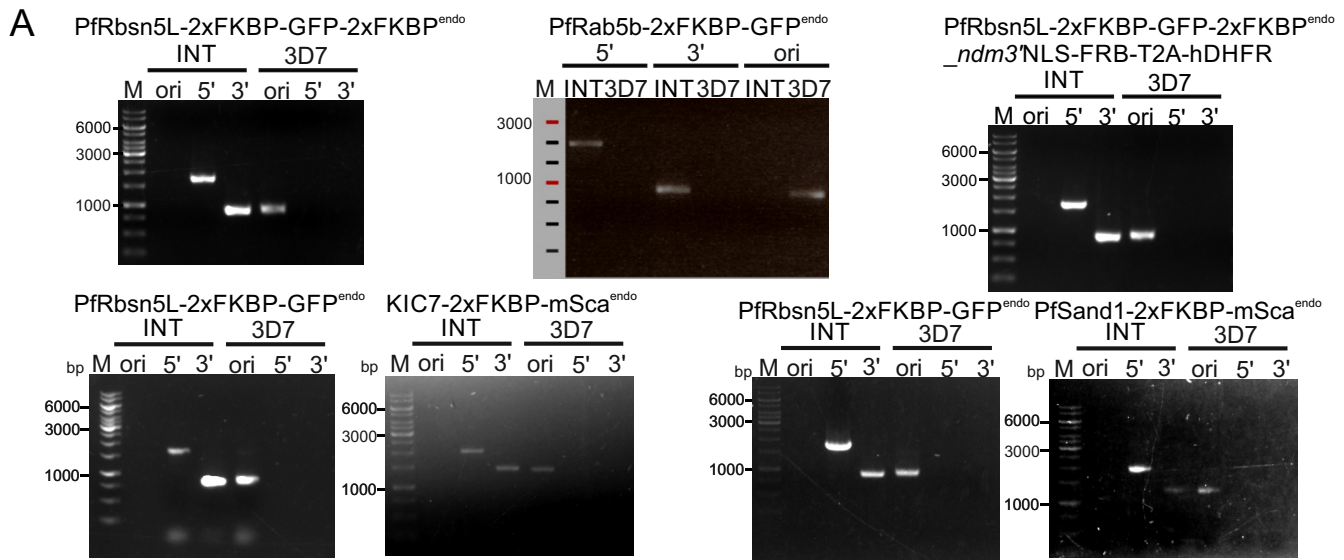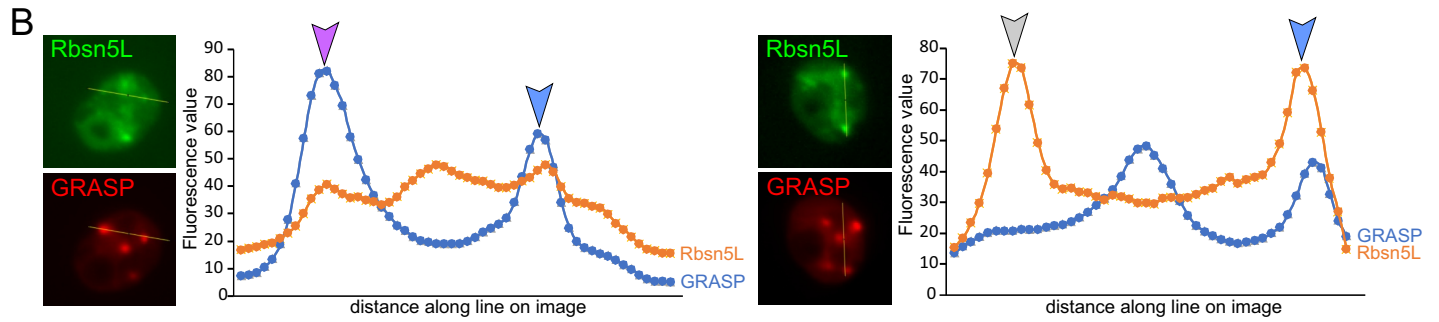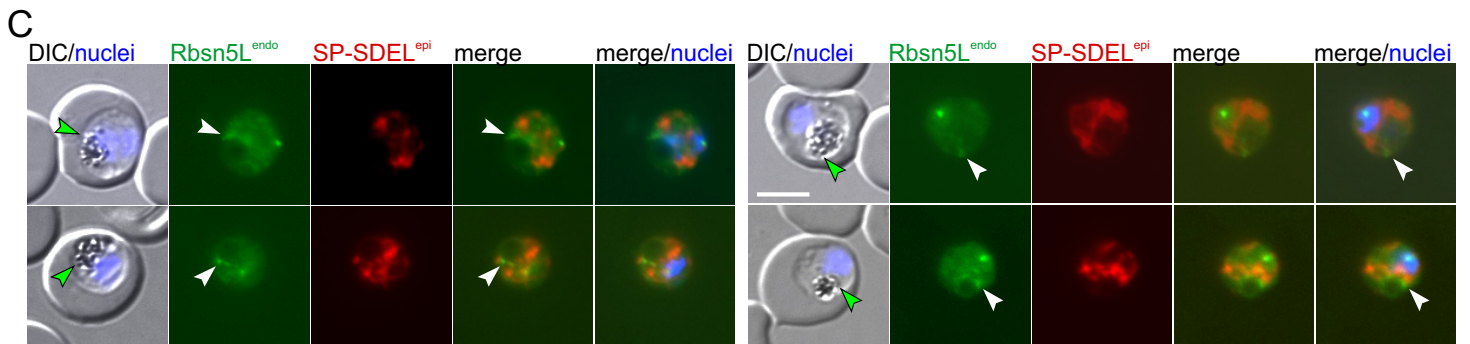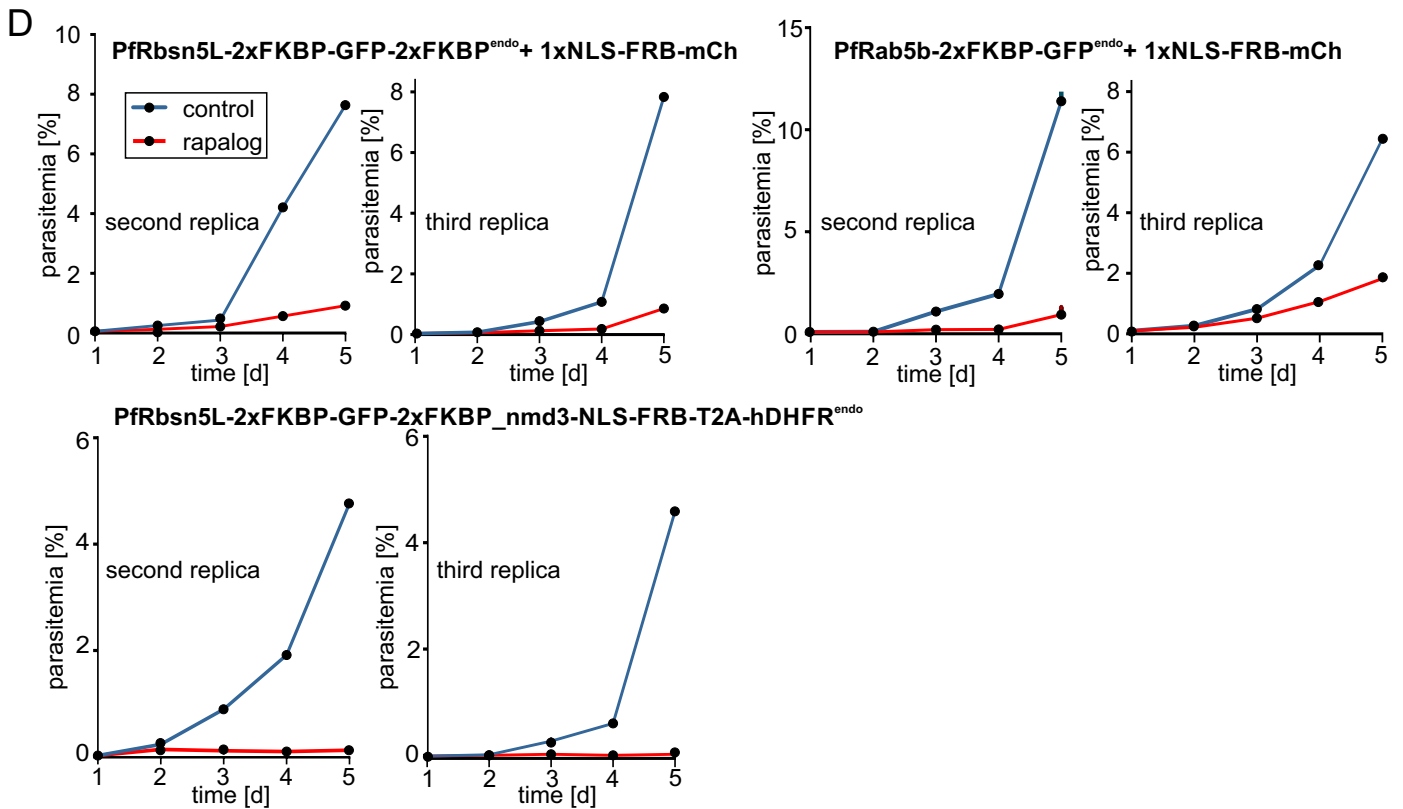

Supplement: pbio.3002639.s002.pdf [file pbio.3002639.s002.pdf]
