# Supplementary material for: Role of Rabenosyn-5 and Rab5b in host cell cytosol uptake reveals conservation of endosomal transport in malaria parasites
Source: PubMed Central journal article supplement (PMC11168701; doi:10.1371/journal.pbio.3002639), 2024-05-31

CoIP with PfRbsn5-2xFKBP-GFP-2xFKBP<sup>endo</sup> + PfRab5b-mCh<sup>epi</sup> parasites

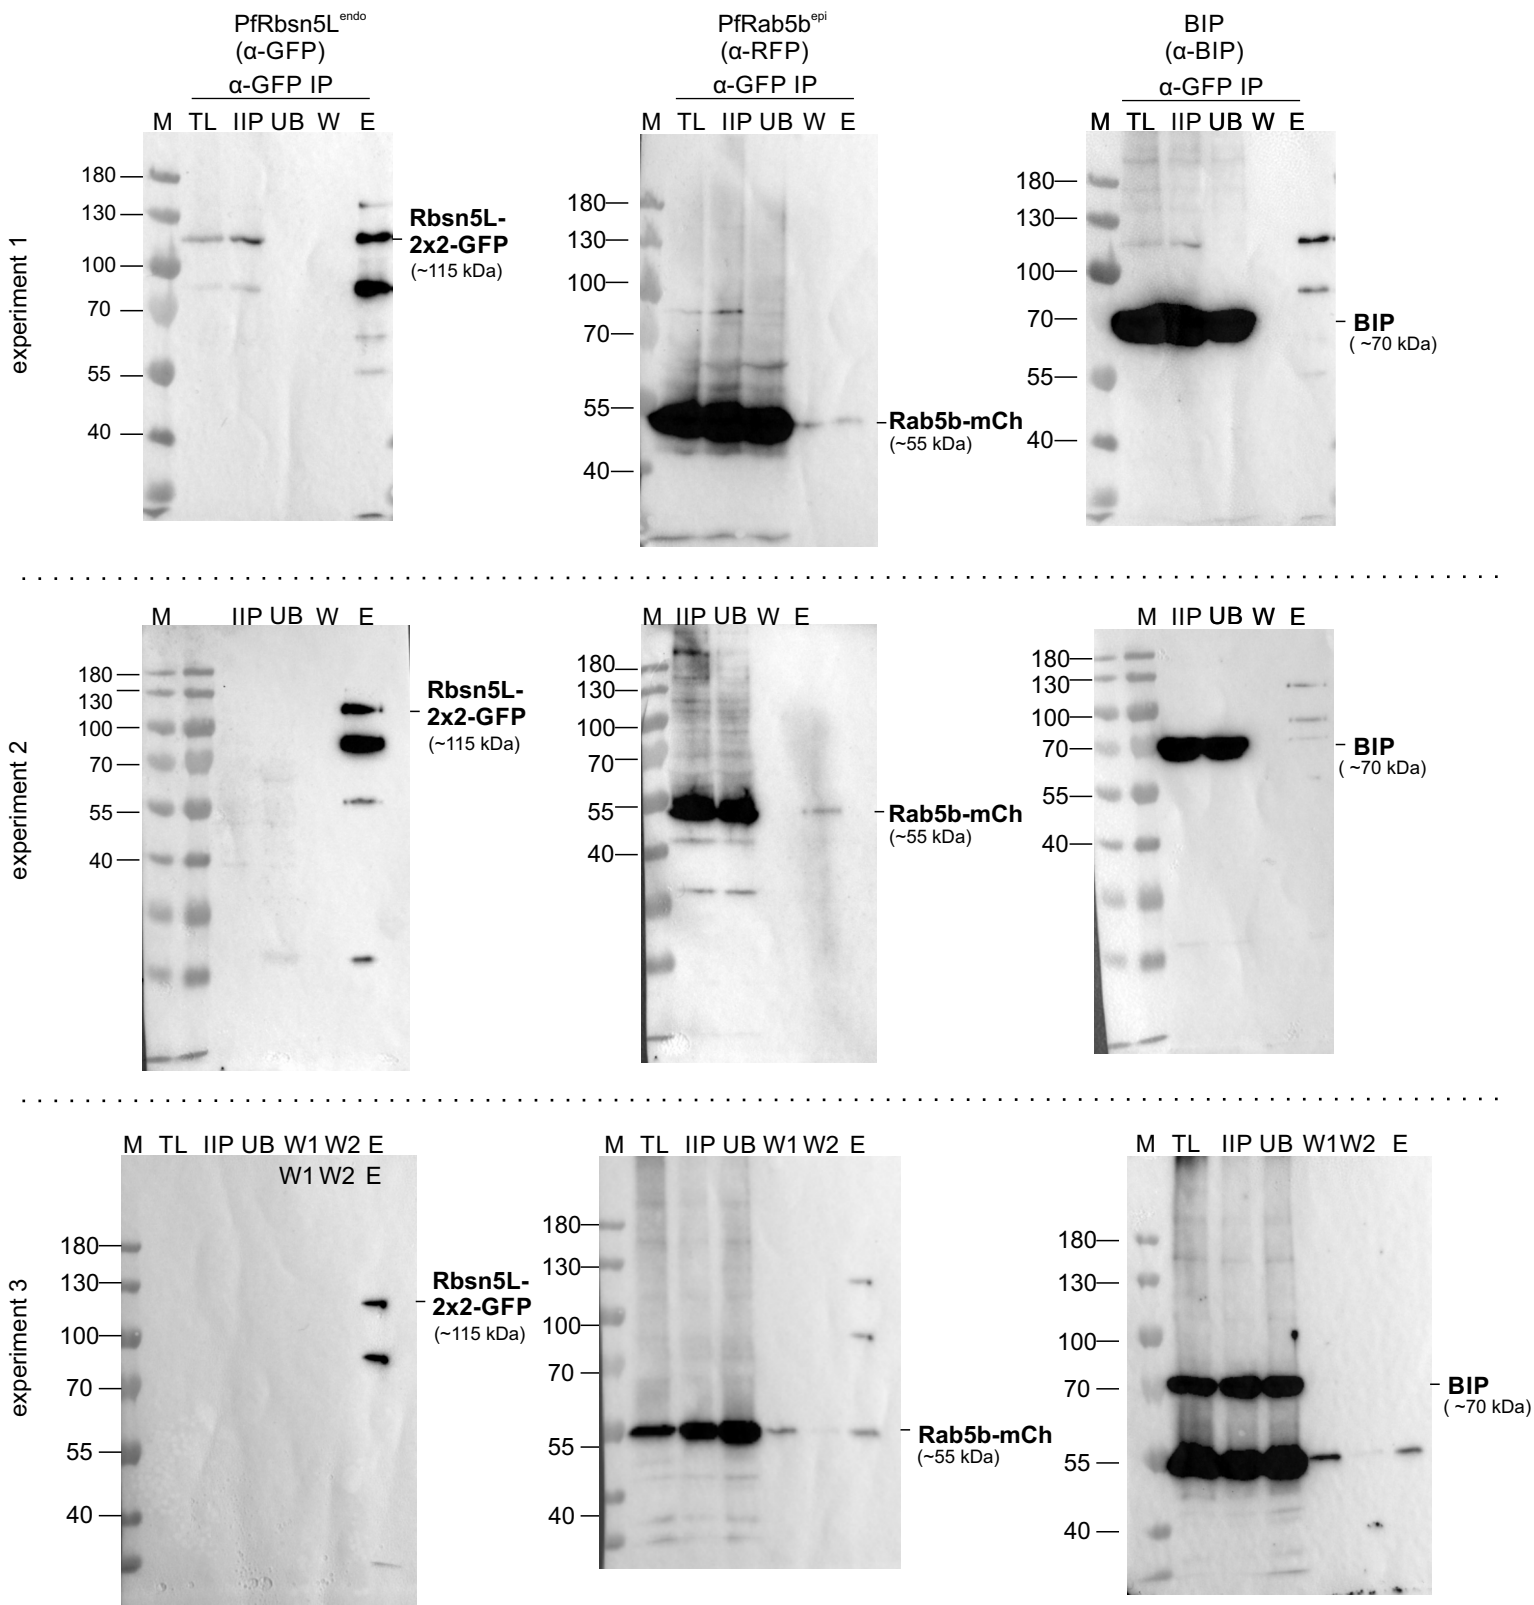

Supplement: pbio.3002639.s008.pdf [file pbio.3002639.s008.pdf]
